# Supplementary material
Source: publisher figshare collection journal article supplement (https://tandf.figshare.com/ndownloader/files/14050571)
Supplement: Supplementary file 1 [file 14050571]

Supplemental Material

Descriptions and Definitions of Obesity, Cardiometabolic Risk, and Metabolic Syndrome Classification Tools

| **Screening Tool or Classification Measurement** | **Description and Definition of Risk** |
| --- | --- |
| *Obesity Classification* | |
| BMI ≥30 (WHO)1 | BMI ≥30  Indicates classification of obesity |
| Adjusted BMI (Ayas)2 | BMI ≥25.3  Indicates classification of obesity in the SCI population |
| Adjusted BMI (Laughton)3 | BMI > 22  Indicates classification of obesity in the SCI population |
| Ideal Body Weight (IBW) Equation (Hamwi)4,5 | 106 + (6 x every inch over height of 60 inches)  Predicts the ideal body weight (pounds) with lowest associated mortality |
| Adjusted Ideal Body Weight (IBW)6,7 | 106 + (6 x every inch over height of 60 inches)  Subtract 10-15 pounds (paraplegia)  Subtract 15-20 pounds (tetraplegia)  or  Subtract 5-10% (paraplegia)  Subtract 10-15% (tetraplegia)  Predicts the ideal body weight (pounds) with lowest associated mortality for the SCI population |
| Waist Circumference (WC)8 | WC > 40” or 102 cm (men)  WC > 35” or 88 cm (women)  Indicates increased body fat and increased risk for obesity-related comorbidities |
| Adjusted WC (Ravensbergen)9 | WC ≥ 94 cm  Indicates increased CVD risk in individuals with SCI |
| *Metabolic Syndrome (MetS) Classification* | |
| MetS – International Diabetes Federation (IDF)10 | WC* ≥ 94 cm (males), WC ≥ 80 cm (females) or BMI >30 kg/m2 PLUS any 2 of the following:  ●TG ≥ 150 mg/dL or specific treatment for this lipid abnormality  ●HDL < 40 mg/dL (males) or <50 mg/dL (females) or specific treatment for this lipid abnormality  ●SBP ≥ 130 mm Hg or DBP ≥ 85 mm Hg or treatment of previously diagnosed HTN  ●FBG ≥100 mg/dL or previously diagnosed type 2 diabetes  *For the purpose of this study, only Europid WC was used |
| MetS – National Cholesterol Education Program (NCEP)11 | Presence of 3 or more of the following:  ●WC > 102 cm (males) or > 88 cm (females)  ●TG ≥ 150 mg/dL  ●HDL <40 mg/dL (males) or <50 mg/dL (females)  ●SBP≥130, DBP ≥ 85  ●FBG ≥ 110 mg/dL |
| MetS – National Heart, Lung, and Blood Institute and American Heart Association (NHLBI/AHA)12 | Presence of 3 out of the 5 following:  ●WC ≥ 102 cm (males) or ≥ 88 cm (females)  ●TG ≥ 150 mg/dL or on drug treatment  ●HDL <40 mg/dL (males) or <50 mg/dL (females) or on drug treatment  ●SBP ≥ 130 mm Hg or DBP ≥ 85 mm Hg or on drug treatment  ●FBG ≥ 100 mg/dL or on drug treatment |
| MetS – World Health Organization (WHO)13 | Fasting glucose ≥ 110 mg/dL or diagnosis of type 2 diabetes PLUS any two of the following:  ●BMI >30 kg/m2  ●TG ≥ 150 mg/dL  ●HDL ≤ 0.9 mmol/L (males) or ≤ 1.0 mmol/L (females)  ●SBP ≥ 140 mm Hg or DBP ≥ 90 mm Hg or on drug treatment |
| *Cardiometabolic Risk Screening Tools* | |
| Framingham Coronary Heart Disease Risk Score (FRS)14 | CVD Points for Women   | **Points** | **Age**  **(years)** | **HDL** | **T.Chol** | **SBP**  **Not Treated** | **SBP Treated** | **Smoker** | **DM** | | --- | --- | --- | --- | --- | --- | --- | --- | | **-3** |  |  |  | <120 |  |  |  | | **-2** |  | 60+ |  |  |  |  |  | | **-1** |  | 50-59 |  |  | <120 |  |  | | **0** | 30-34 | 45-49 | <160 | 120-129 |  | No | No | | **1** |  | 35-44 | 160-199 | 130-139 |  |  |  | | **2** | 35-39 | <35 |  | 140-149 | 120-129 |  |  | | **3** |  |  | 200-239 |  | 130-139 | Yes |  | | **4** | 40-44 |  | 240-279 | 150-159 |  |  | Yes | | **5** | 45-49 |  | 280+ | 160+ | 140-149 |  |  | | **6** |  |  |  |  | 150-159 |  |  | | **7** | 50-54 |  |  |  | 160+ |  |  | | **8** | 55-59 |  |  |  |  |  |  | | **9** | 60-64 |  |  |  |  |  |  | | **10** | 65-69 |  |  |  |  |  |  | | **11** | 70-74 |  |  |  |  |  |  | | **12** | 75+ |  |  |  |  |  |  |   Points for Women [Points (Risk %)]  ≤ -2(<1), -1(1.0), 0(1.2), 1(1.5), 2(1.7), 3(2.0), 4(2.4), 5(2.8), 6(3.3), 7(3.9), 8(4.5), 9(5.3), 10(6.3), 11(7.3), 12(8.6), 13(10.0), 14(11.7), 15(13.7), 16(15.9), 17(18.5), 18(21.5), 19(24.8), 20(28.5), 21+(>30)  CVD Points for Men   | **Points** | **Age (years)** | **HDL** | **T.Chol** | **SBP**  **Not Treated** | **SBP Treated** | **Smoker** | **DM** | | --- | --- | --- | --- | --- | --- | --- | --- | | **-2** |  | 60+ |  | <120 |  |  |  | | **-1** |  | 50-59 |  |  |  |  |  | | **0** | 30-34 | 45-49 | <160 | 120-129 | <120 | No | No | | **1** |  | 35-44 | 160-199 | 130-139 |  |  |  | | **2** | 35-39 | <35 | 200-239 | 140-159 | 120-129 |  |  | | **3** |  |  | 240-279 | 160+ | 130-139 |  | Yes | | **4** |  |  | 280+ |  | 140-159 | Yes |  | | **5** | 40-44 |  |  |  | 160+ |  |  | | **6** | 45-49 |  |  |  |  |  |  | | **7** |  |  |  |  |  |  |  | | **8** | 50-54 |  |  |  |  |  |  | | **9** |  |  |  |  |  |  |  | | **10** | 55-59 |  |  |  |  |  |  | | **11** | 60-64 |  |  |  |  |  |  | | **12** | 65-69 |  |  |  |  |  |  | | **13** |  |  |  |  |  |  |  | | **14** | 70-74 |  |  |  |  |  |  | | **15** | 75+ |  |  |  |  |  |  |   Points for Men [Points (Risk %)]  ≤-3 (<1), -2(1.1), -1(1.4), 0(1.6), 1(1.9), 2(2.3), 3(2.8), 4(3.3), 5(3.9), 6(4.7), 7(5.6), 8(6.7), 9(7.9), 10(9.4), 11(11.2), 12(13.2), 13(15.6), 14(18.4), 15(21.6), 16(25.3), 17(29.4), 18+(>30)  >20% indicates high risk of developing CVD |
| Cardiometabolic Disease Staging System (CMDS)15 | **Stage 0 (Metabolically Healthy)**: No risk factors  **Stage 1 (One or Two Risk Factors)**: 1-2 of the following risk factors:  ●High waist circumference (≥112cm in men and ≥88 cm in women)  ●Elevated blood pressure (systolic ≥ 130 mmHg and/or diastolic ≥ 85mmHg) or on antihypertensive  medication  ●Reduced serum HDL cholesterol (<40 mg/dL in men; < 50 mg/dL in women) or on medication  ●Elevated fasting serum triglycerides ≥ 150 mg/dL) or on medication  **Stage 2 (Metabolic Syndrome or Prediabetes)**: Have only one of the following 3 conditions:  ●Metabolic Syndrome based on 3 or more of 4 risk factors (high waist circumference, elevated blood  pressure, reduced HDL-C, and elevated triglycerides)  ●Impaired fasting glucose (IFG ≥ 100 mg/dL)  ●Impaired glucose tolerance (IGT; 2-h glucose ≥ 140 mg/dL)  **Stage 3 (Metabolic Syndrome + Prediabetes)**: Have any two of the following three conditions:  ●Metabolic syndrome  ●IFG  ●IGT  **Stage 4 (T2DM and/or CVD)**: Have T2DM and/or cardiovascular disease (CVD)  ●T2DM (fasting glucose ≥ 126 mg/dL or 2-h glucose ≥ 200 mg/dL or on antidiabetic therapy)  ●Active CVD (angina pectoris, or status post a CVD event such as acute coronary artery syndrome,  stent placement, coronary artery bypass, thrombotic stroke, non-traumatic amputation due to peripheral  vascular disease) |
| Edmonton Obesity Staging System (EOSS)16 | **Stage 0**: No apparent obesity-related risk factors (e.g. blood pressure, serum lipids, fasting glucose, etc. within normal range), no physical symptoms, no psychopathology, no functional limitations and (or) impairment of well-being  **Stage 1**: Presence of obesity-related subclinical risk factors (e.g. borderline hypertension, impaired fasting glucose, elevated liver enzymes, etc.), mild physical symptoms (e.g. dyspnea on moderate exertion, occasional aches and pains, fatigue, etc.), mild functional limitations, mild psychopathology and (or) mild impairment of well being  **Stage 2**: Presence of established obesity-related chronic disease (e.g. hypertension, type 2 diabetes, sleep apnea, osteoarthritis, reflux disease, polycystic ovary syndrome, anxiety disorder, etc.), moderate limitations in activities of daily living and (or) moderate impairment of well being  **Stage 3**: Established end-organ damage (e.g. myocardial infarction, heart failure, diabetic complications, incapacitating osteoarthritis, etc.), significant psychopathology, significant functional limitations, and (or) significant impairment of well being  **Stage 4**: Severe (potentially end-stage) disabilities from obesity-related chronic diseases, severe disabling psychopathology, severe functional limitations, and (or) severe impairment of well being |
| Abbreviations: BMI, body mass index; CVD, cardiovascular disease; DBP, diastolic blood pressure; FBG, fasting blood glucose; HDL, high-density lipoprotein; HTN, hypertension; IBW, ideal body weight; IFG: impaired fasting glucose; IGT, impaired glucose tolerance; SBP, systolic blood pressure; SCI, spinal cord injury; T2DM, type 2 diabetes mellitus; TG, triglycerides; WC, waist circumference; WHO, World Health Organization | |

References

1. Obesity: preventing and managing the global epidemic. Report of a WHO consultation. World Health Organ Tech Rep Ser. 2000;894:i-xii, 1-253.

2. Ayas NT, Epstein LJ, Lieberman SL, *et al*. Predictors of loud snoring in persons with spinal cord injury. J Spinal Cord Med. 2001;24(1):30-34.

3. Laughton GE, Buchholz AC, Martin Ginis KA, Goy RE, Group SSR. Lowering body mass index cutoffs better identifies obese persons with spinal cord injury. Spinal Cord. 2009;47(10):757-762.

4. Hamwi G. Therapy: changing dietary concept. In: Danowski TS, ed. Diabetes Mellitus: Diagnosis and Treatment. New York, NY: American Diabetes Association. 1964:73-78.

5. Shah B, Sucher K, Hollenbeck CB. Comparison of ideal body weight equations and published height-weight tables with body mass index tables for healthy adults in the United States. Nutr Clin Pract. 2006;21(3):312-319.

6. Academy of Nutrition and Dietetics Evidence Analysis Library. "SCI: Assessment of Body Composition: Estimation of Ideal Body Weight" Accessed 18 May 2018: <https://wwwandealorg/templatecfm?template=guide_summary&key=2305#supportevidence>

7. Peiffer SC, Blust P, Leyson JF. Nutritional assessment of the spinal cord injured patient. J Am Diet Assoc. 1981;78(5):501-505.

8. Klein S, Allison DB, Heymsfield SB, *et al*. Waist Circumference and Cardiometabolic Risk: a Consensus Statement from Shaping America's Health: Association for Weight Management and Obesity Prevention; NAASO, the Obesity Society; the American Society for Nutrition; and the American Diabetes Association. Obesity (Silver Spring). 2007;15(5):1061-1067.

9. Ravensbergen HR, Lear SA, Claydon VE. Waist circumference is the best index for obesity-related cardiovascular disease risk in individuals with spinal cord injury. J Neurotrauma. 2014;31(3):292-300.

10. Alberti KG, Zimmet P, Shaw J. Metabolic syndrome--a new world-wide definition. A Consensus Statement from the International Diabetes Federation. Diabet Med. 2006;23(5):469-480.

11. Expert Panel on Detection E, Treatment of High Blood Cholesterol in A. Executive Summary of The Third Report of The National Cholesterol Education Program (NCEP) Expert Panel on Detection, Evaluation, And Treatment of High Blood Cholesterol In Adults (Adult Treatment Panel III). JAMA. 2001;285(19):2486-2497.

12. Grundy SM, Cleeman JI, Daniels SR, *et al*. Diagnosis and management of the metabolic syndrome: an American Heart Association/National Heart, Lung, and Blood Institute Scientific Statement. Circulation. 2005;112(17):2735-2752.

13. Alberti KG, Zimmet PZ. Definition, diagnosis and classification of diabetes mellitus and its complications. Part 1: diagnosis and classification of diabetes mellitus provisional report of a WHO consultation. Diabet Med. 1998;15(7):539-553.

14. D'Agostino RB, Sr., Vasan RS, Pencina MJ, *et al*. General cardiovascular risk profile for use in primary care: the Framingham Heart Study. Circulation. 2008;117(6):743-753.

15. Guo F, Moellering DR, Garvey WT. The progression of cardiometabolic disease: validation of a new cardiometabolic disease staging system applicable to obesity. Obesity (Silver Spring). 2014;22(1):110-118.

16. Sharma AM, Kushner RF. A proposed clinical staging system for obesity. Int J Obes (Lond). 2009;33(3):289-295.
